# Supplementary material for: Does evolutionary theory need a rethink?
Source: Springer Nature journal article supplement (doi:10.1038/514161a), 2014-10-06

**Supplementary information to:  
Does evolutionary theory need a rethink? (Comment in *Nature* 514, 161–164; 2014)**

**POINT: Yes, urgently**

Kevin Laland, Tobias Uller, Marc Feldman, Kim Sterelny, Gerd B. Müller, Armin Moczek, Eva Jablonka, John Odling-Smee.

Table S1: The EES expands what is recognized as causally relevant in the process of evolution

|                                                                                                                                                                                                                                                                                                                                                                                                                                                            |                                                                                                                                                                                                                                                                                                                                                                                                                                                                                                                                                                                                                                  |
|------------------------------------------------------------------------------------------------------------------------------------------------------------------------------------------------------------------------------------------------------------------------------------------------------------------------------------------------------------------------------------------------------------------------------------------------------------|----------------------------------------------------------------------------------------------------------------------------------------------------------------------------------------------------------------------------------------------------------------------------------------------------------------------------------------------------------------------------------------------------------------------------------------------------------------------------------------------------------------------------------------------------------------------------------------------------------------------------------|
| <p><b>Standard evolutionary theory is gene-centered, and treats as evolutionary processes solely those events that change gene frequencies</b></p>                                                                                                                                                                                                                                                                                                         | <p><b>The EES is organism-centred, and recognizes other processes in addition to those that change gene frequencies</b></p>                                                                                                                                                                                                                                                                                                                                                                                                                                                                                                      |
| <p><b>Mutation</b>: introduces new variants at random. Repeated occurrence of the same genetic variants is called mutation pressure</p> <p><b>Natural selection</b>: makes adaptive variants more common through differential survival and reproduction</p> <p><b>Genetic drift</b>: random changes in frequency of genetic variants due to sampling</p> <p><b>Gene flow</b>: variants enter and leave a population via migration, dispersal or mating</p> | <p><b>Developmental bias</b>: developmental processes guide organisms' forms along particular pathways</p> <p><b>Plasticity</b>: novel, potentially functional, forms are induced by the environment and subsequently stabilized by selection</p> <p><b>Niche construction</b>: organisms systematically modify environmental resources in ways that impose biases on descendants' development and evolution</p> <p><b>Inclusive inheritance</b>: organisms inherit a wide variety of materials from their ancestors, including epigenetic marks, hormones, symbionts, learned knowledge and skills, and ecological legacies</p> |

**Figure S1:** SET recognizes as 'evolutionary processes' only those processes that directly change gene frequencies. In contrast, the EES recognizes additional evolutionary causes, including processes that bias the outcome of natural selection, specifically developmental bias and niche construction. Processes that generate phenotypic variation, including developmental plasticity, and some forms of extragenetic inheritance, are sources of developmental bias and niche construction. Developmental bias and niche construction can also affect other evolutionary processes, such as drift and gene flow. Arrows represent causal influences. Processes shown in red are those emphasized by the EES, but not by SET.

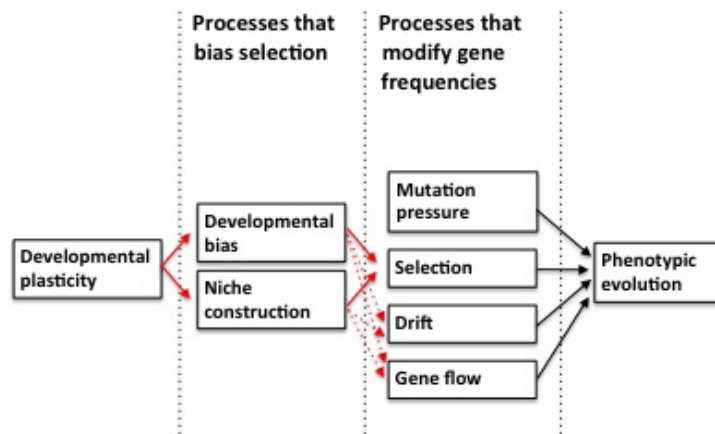

Supplement: 41586_2014_BF514161a_MOESM1_ESM.pdf [file 41586_2014_BF514161a_MOESM1_ESM.pdf]
